# Supplementary material for: Network topology-based detection of differential gene regulation and regulatory switches in cell metabolism and signaling
Source: Springer Nature journal article supplement (doi:10.1186/1752-0509-8-56), 2014-05-16
Supplement: 12918_2014_1322_MOESM1_ESM.pdf [file 12918_2014_1322_MOESM1_ESM.pdf]

# **Network topology-based detection of differential gene regulation and regulatory switches in cell metabolism and signaling**

Rosario M Piro, Stefan Wiesberg, Gunnar Schramm, Nico Rebel, Marcus Oswald, Roland Eils, Gerhard Reinelt, Rainer König

## **Supplementary information**

## **Content**

[Table S1: Pathway analysis with PathWave using the human pathways from BiGG](#) (page 3)

[Table S2: Pathway analysis with DAVID for the lung cancer dataset on metabolic KEGG pathways](#) (page 4)

[Table S3: Pathway analysis with GSEA for the lung cancer dataset on metabolic KEGG pathways](#) (page 4)

[Table S4: Metabolites removed from the human metabolic model from BiGG](#) (page 4)

[Figure S1: Glycolysis in lung adenocarcinoma compared to normal tissue](#) (page 6)

[Figure S2: TCA cycle in lung adenocarcinoma compared to normal tissue](#) (page 7)

[Figure S3: Tryptophan metabolism in lung tumors compared to paired adjacent normal tissue](#) (page 8)

[Figure S4: Starch and sucrose metabolism in long-lived flies compared to flies with normal lifespan](#) (page 9)

[Figure S5: Circadian rhythm in long-lived \*D. melanogaster\* compared to \*D. melanogaster\* with normal lifespan](#) (page 10)

[Stability of P-values and robustness of pathway rankings](#) (page 11)

[Figure S6: Stability of pathway \*P\*-values as measured by their variation coefficients](#) (page 12)

[Figure S7: Recall of pathway significance as a function of the mean \*P\*-value](#) (page 12)

[Figure S8: Robustness of pathway rankings](#) (page 13)

**Table S1: Pathway analysis with PathWave using the human pathways from BiGG**

| Human metabolic model subsystem (pathway)              | P*       | up* | no_ch* | down* |
|--------------------------------------------------------|----------|-----|--------|-------|
| Arginine_and_Proline_Metabolism                        | < 1E-16  | 6   | 5      | 5     |
| Blood_Group_Biosynthesis                               | < 1E-16  | 23  | 12     | 10    |
| Cholesterol_Metabolism                                 | < 1E-16  | 11  | 11     | 9     |
| Glycerophospholipid_Metabolism                         | < 1E-16  | 5   | 13     | 9     |
| Glycine,_Serine,_and_Threonine_Metabolism              | < 1E-16  | 10  | 1      | 1     |
| Glycolysis_Gluconeogenesis                             | < 1E-16  | 11  | 3      | 3     |
| Glycosylphosphatidylinositol__GPI__anchor_biosynthesis | < 1E-16  | 15  | 19     | 2     |
| IMP_Biosynthesis                                       | < 1E-16  | 10  | 0      | 0     |
| Inositol_Phosphate_Metabolism                          | < 1E-16  | 4   | 18     | 9     |
| Keratan_sulfate_biosynthesis                           | < 1E-16  | 38  | 18     | 3     |
| N_Glycan_Biosynthesis                                  | < 1E-16  | 25  | 6      | 17    |
| Nucleotides                                            | < 1E-16  | 39  | 41     | 5     |
| Pyruvate_Metabolism                                    | < 1E-16  | 5   | 10     | 7     |
| Sphingolipid_Metabolism                                | < 1E-16  | 22  | 16     | 30    |
| Steroid_Metabolism                                     | < 1E-16  | 16  | 16     | 7     |
| Transport,_Extracellular                               | < 1E-16  | 49  | 38     | 26    |
| Transport,_Mitochondrial                               | < 1E-16  | 16  | 2      | 1     |
| Tryptophan_metabolism                                  | < 1E-16  | 6   | 15     | 11    |
| Tyrosine_metabolism                                    | < 1E-16  | 3   | 24     | 19    |
| Eicosanoid_Metabolism                                  | 3.82E-14 | 2   | 2      | 11    |
| Chondroitin____heparan_sulfate_biosynthesis            | 4.77E-14 | 3   | 19     | 19    |
| Bile_Acid_Biosynthesis                                 | 1.15E-13 | 16  | 10     | 11    |
| Folate_Metabolism                                      | 1.62E-13 | 9   | 21     | 1     |
| Carnitine_shuttle                                      | 2.96E-13 | 31  | 31     | 31    |
| Pentose_Phosphate_Pathway                              | 2.85E-12 | 5   | 5      | 5     |
| Chondroitin_sulfate_degradation                        | 4.02E-12 | 10  | 22     | 1     |
| Keratan_sulfate_degradation                            | 5.16E-09 | 26  | 45     | 0     |
| Fatty_acid_oxidation                                   | 7.23E-04 | 0   | 2      | 25    |

\*up is the number of metabolic reactions up-regulated in lung adenocarcinoma; down the number of down-regulated reactions; and no\_ch the number of reactions without notable changes. P is the Bonferroni corrected P-value for the entire pathway.

**Table S2: Pathway analysis with DAVID for the lung cancer dataset on metabolic KEGG pathways**

| Pathway name                | Fold enrichment | P (nominal)* | P (Bonferroni) |
|-----------------------------|-----------------|--------------|----------------|
| Aminoacyl-tRNA biosynthesis | 1.95            | 7.26E-06     | 6.46E-04       |
| Purine metabolism           | 1.40            | 1.10E-04     | 9.80E-03       |
| N-Glycan biosynthesis       | 1.57            | 4.54E-03     | 4.04E-01       |
| Phenylalanine metabolism    | 1.88            | 4.80E-03     | 4.27E-01       |
| Tyrosine metabolism         | 1.53            | 1.09E-02     | 9.70E-01       |
| Pyrimidine metabolism       | 1.28            | 3.46E-02     | 1.00E+00       |

\*Only pathways with a nominal (uncorrected) P-value < 0.05 are shown.

**Table S3: Pathway analysis with GSEA for the lung cancer dataset on metabolic KEGG pathways**

| Pathway                     | NES  | P (nominal)* | P (Bonferroni) |
|-----------------------------|------|--------------|----------------|
| Pyrimidine metabolism       | 1.69 | 4.45E-03     | 3.96E-01       |
| Aminoacyl-tRNA biosynthesis | 1.59 | 2.03E-02     | 1.00E+00       |
| Purine metabolism           | 1.36 | 4.10E-02     | 1.00E+00       |

\*Only pathways with a nominal (uncorrected) P-value < 0.05 are shown.

**Table S4: Metabolites removed from the human metabolic model from BiGG**

| Compartment: Cytosol (_c) |                |                |                |                |
|---------------------------|----------------|----------------|----------------|----------------|
| M_h_c                     | M_h2o_c        | M_atp_c        | M_pi_c         | M_adp_c        |
| M_na1_c                   | M_coa_c        | M_o2_c         | M_nadp_c       | M_nadph_c      |
| M_ppi_c                   | M_nad_c        | M_nadh_c       | M_amp_c        | M_co2_c        |
| M_nh4_c                   | M_crn_c        | M_h2o2_c       | M_gln_DASH_L_c | M_hco3_c       |
| M_dcdp_c                  | M_accoa_c      | M_ser_DASH_L_c | M_ala_DASH_L_c | M_ump_c        |
| M_udp_c                   | M_gly_c        | M_gdp_c        | M_cys_DASH_L_c | M_dadp_c       |
| M_dgdp_c                  | M_dudp_c       | M_glc_DASH_D_c | M_dtdp_c       | M_cmp_c        |
| M_cl_c                    | M_amet_c       | M_R2coa_hs_c   | M_ahcys_c      | M_thr_DASH_L_c |
| M_pyr_c                   | M_paps_c       | M_ctp_c        | M_pap_c        | M_malcoa_c     |
| M_gdpmann_c               | M_asn_DASH_L_c | M_so4_c        | M_Rtotalcoa_c  | M_mthgxl_c     |
| M_gthrd_c                 | M_for_c        | M_datp_c       | M_dag_hs_c     | M_cdp_c        |
| M_ac_c                    | M_thf_c        | M_pmtcoa_c     | M_pchol_hs_c   | M_dgtp_c       |
| M_chol_c                  | M_ACP_c        | M_utp_c        | M_udpg_c       | M_uacgam_c     |
| M_gtp_c                   | M_f6p_c        | M_dctp_c       | M_asp_DASH_L_c | M_adn_c        |

|                                        |                |                |                 |                |
|----------------------------------------|----------------|----------------|-----------------|----------------|
| M_uri_c                                | M_k_c          | M_dttp_c       | M_dhap_c        | M_dcmp_c       |
| M_arachd_c                             | M_retn_c       | M_retinol_c    | M_pro_DASH_L_c  | M_pail_hs_c    |
| M_oh1_c                                | M_mal_DASH_L_c | M_lys_DASH_L_c | M_lald_DASH_D_c | M_g3p_c        |
| M_fum_c                                | M_cytd_c       | M_acald_c      |                 |                |
| Compartment: EndoplasmicReticulum (_r) |                |                |                 |                |
| M_h_r                                  | M_h2o_r        | M_nadp_r       | M_nadph_r       | M_o2_r         |
| M_dolp_U_r                             | M_dolp_L_r     | M_nad_r        | M_nadh_r        | M_udp_r        |
| M_pe_hs_r                              | M_dolmanp_U_r  | M_dolmanp_L_r  | M_udpglcur_r    | M_dag_hs_r     |
| M_pi_r                                 | M_glc_DASH_D_r | M_chsterol_r   |                 |                |
| Compartment: Extraorganism (_e)        |                |                |                 |                |
| M_na1_e                                | M_h_e          | M_h2o_e        | M_hco3_e        | M_gln_DASH_L_e |
| M_cl_e                                 | M_ser_DASH_L_e | M_cys_DASH_L_e | M_pi_e          | M_glc_DASH_D_e |
| M_ala_DASH_L_e                         | M_thr_DASH_L_e | M_gly_e        | M_glu_DASH_L_e  | M_asn_DASH_L_e |
| M_k_e                                  |                |                |                 |                |
| Compartment: GolgiApparatus (_g)       |                |                |                 |                |
| M_h_g                                  | M_udp_g        | M_udpgal_g     | M_uacgam_g      | M_paps_g       |
| M_pap_g                                | M_cmp_g        | M_cmpacna_g    | M_h2o_g         | M_gdp_g        |
| M_gdpfuc_g                             | M_man_g        | M_udpacgal_g   | M_udpglcur_g    |                |
| Compartment: Lysosome (_l)             |                |                |                 |                |
| M_h2o_l                                | M_h_l          | M_so4_l        | M_acgam_l       | M_glu_DASH_L_l |
| M_pi_l                                 | M_glcur_l      | M_acgal_l      | M_gal_l         |                |
| Compartment: Mitochondria (_m)         |                |                |                 |                |
| M_h_m                                  | M_h2o_m        | M_coa_m        | M_nad_m         | M_nadh_m       |
| M_atp_m                                | M_fad_m        | M_fadh2_m      | M_adp_m         | M_nadp_m       |
| M_nadph_m                              | M_crn_m        | M_pi_m         | M_o2_m          | M_co2_m        |
| M_dudp_m                               | M_dadp_m       | M_dgdp_m       | M_dcdp_m        | M_dtdp_m       |
| Moccoa_m                               | M_pyr_m        | M_ppi_m        | M_ppcoa_m       | M_dutp_m       |
| M_datp_m                               | M_amp_m        | M_gtp_m        | M_gdp_m         | M_hco3_m       |
| Compartment: Nucleus (_n)              |                |                |                 |                |
| M_h_n                                  | M_atp_n        | M_adp_n        | M_h2o_n         | M_udp_n        |
| M_pi_n                                 | M_dcdp_n       | M_cdp_n        | M_dcmp_n        |                |
| Compartment: Peroxisome (_x)           |                |                |                 |                |
| M_h2o_x                                | M_coa_x        | M_o2_x         | M_h_x           | M_h2o2_x       |
| M_accoa_x                              | M_nadh_x       | M_nad_x        |                 |                |

**GLYCOLYSIS / GLUCONEOGENESIS**

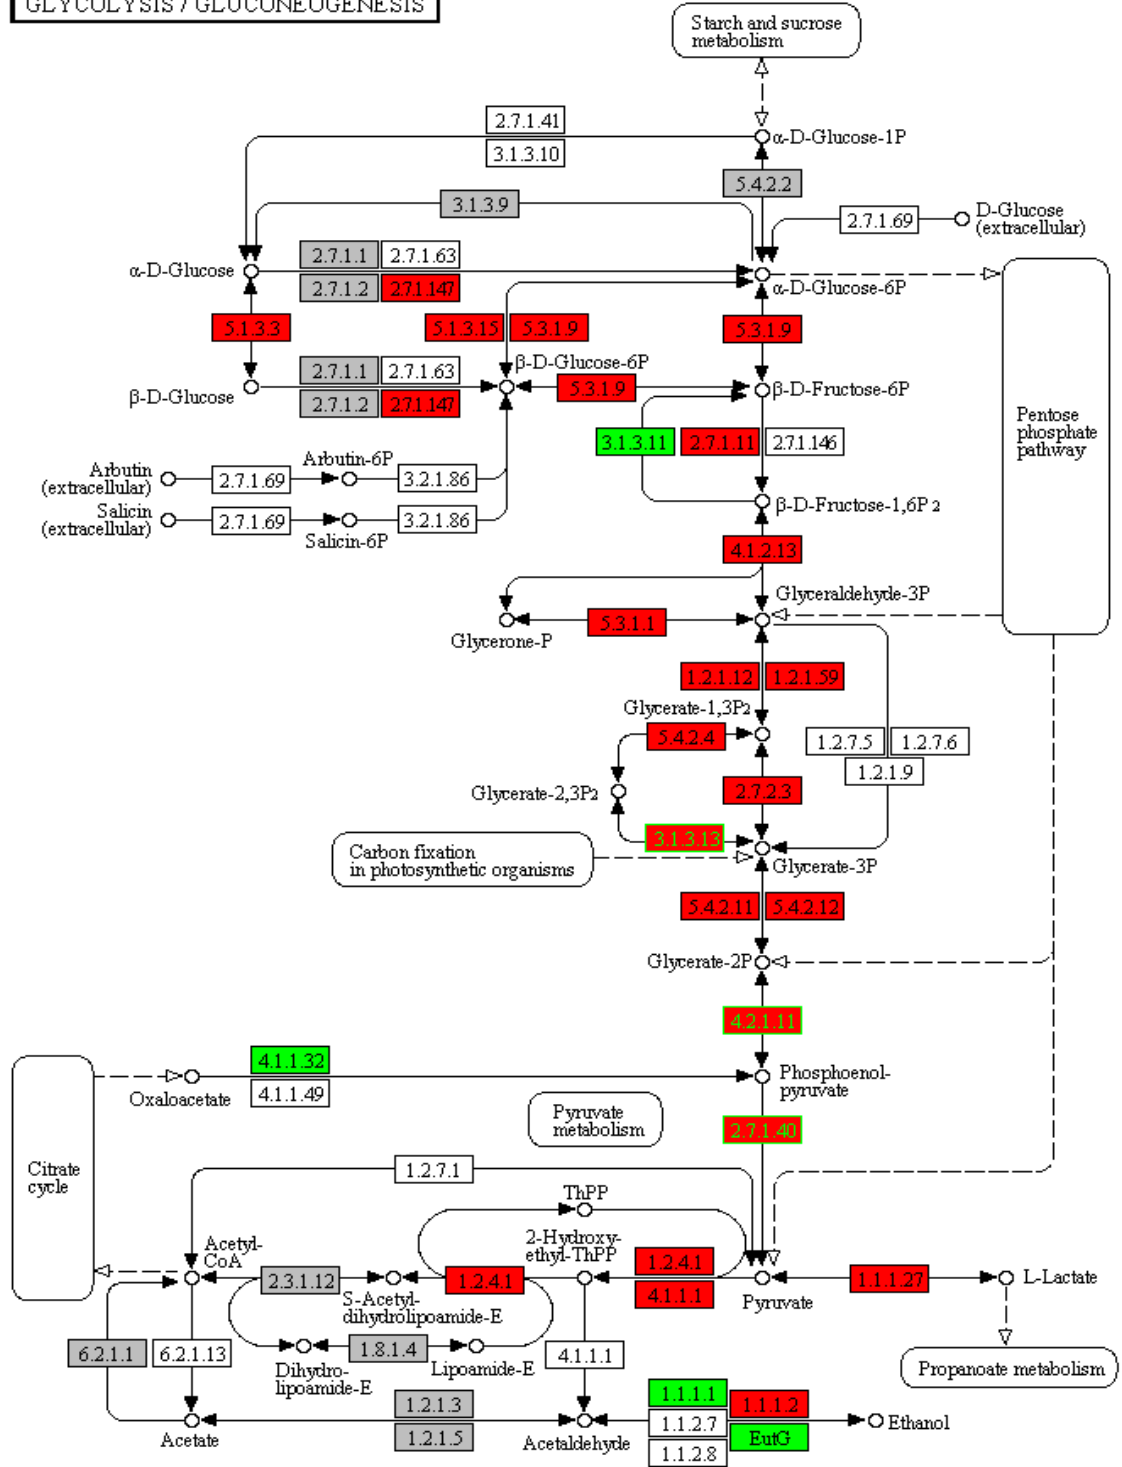

00010 9/3/13  
(c) Kanehisa Laboratories

**Figure S1: Glycolysis in lung adenocarcinoma compared to normal tissue**  
 red = up-regulated; green = down-regulated; grey = no notable change  
 (template is taken from <http://www.genome.jp/kegg/>)

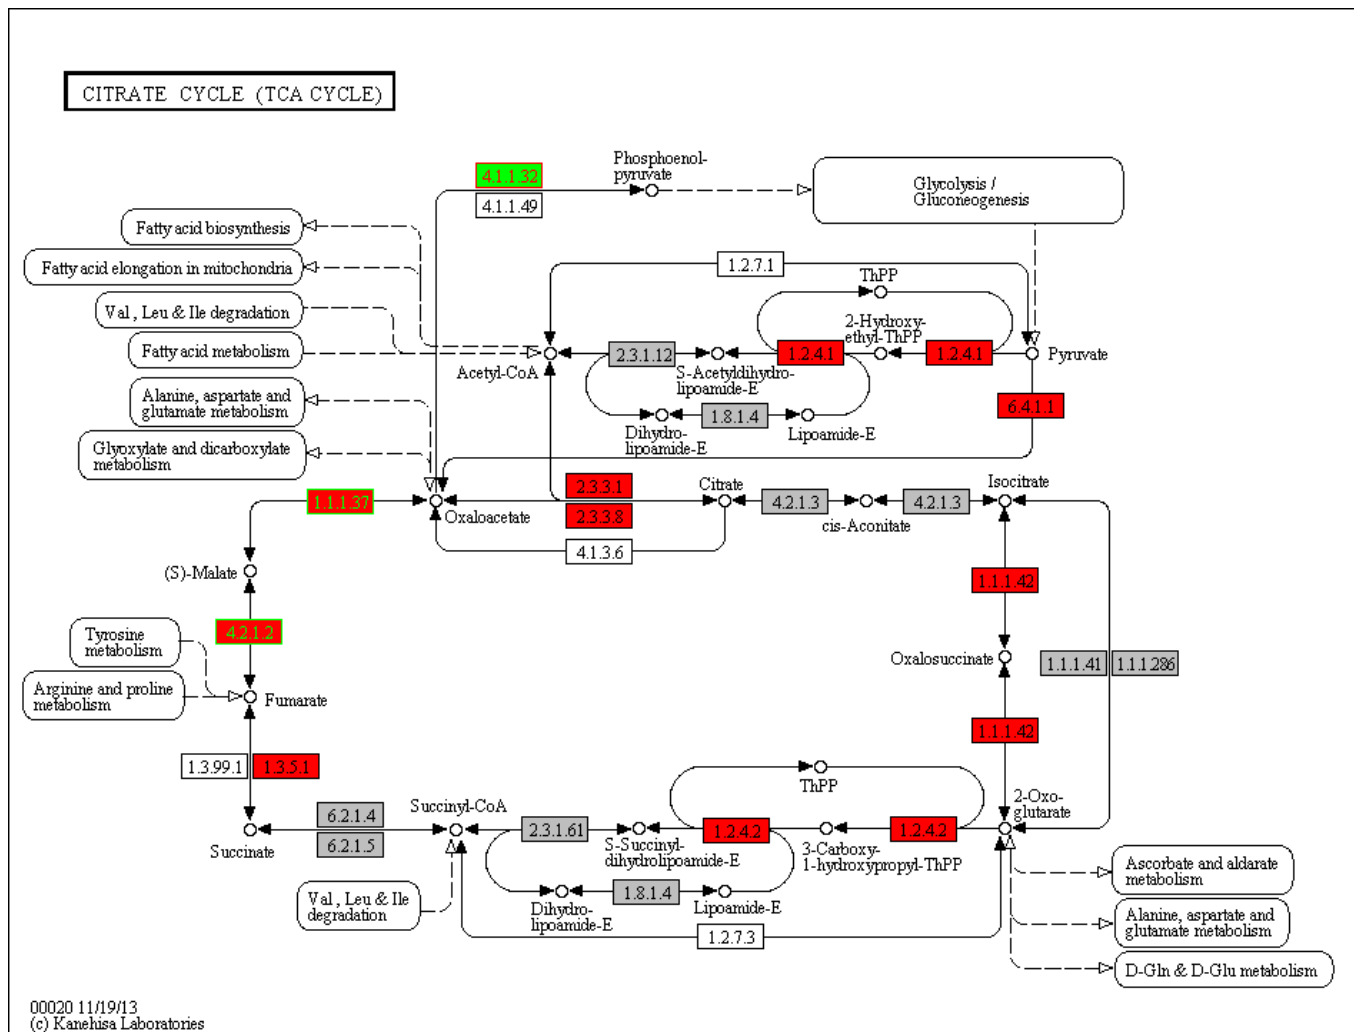

**Figure S2: TCA cycle in lung adenocarcinoma compared to normal tissue**  
 red = up-regulated; green = down-regulated; grey = no notable change.  
 (template is taken from <http://www.genome.jp/kegg/>)

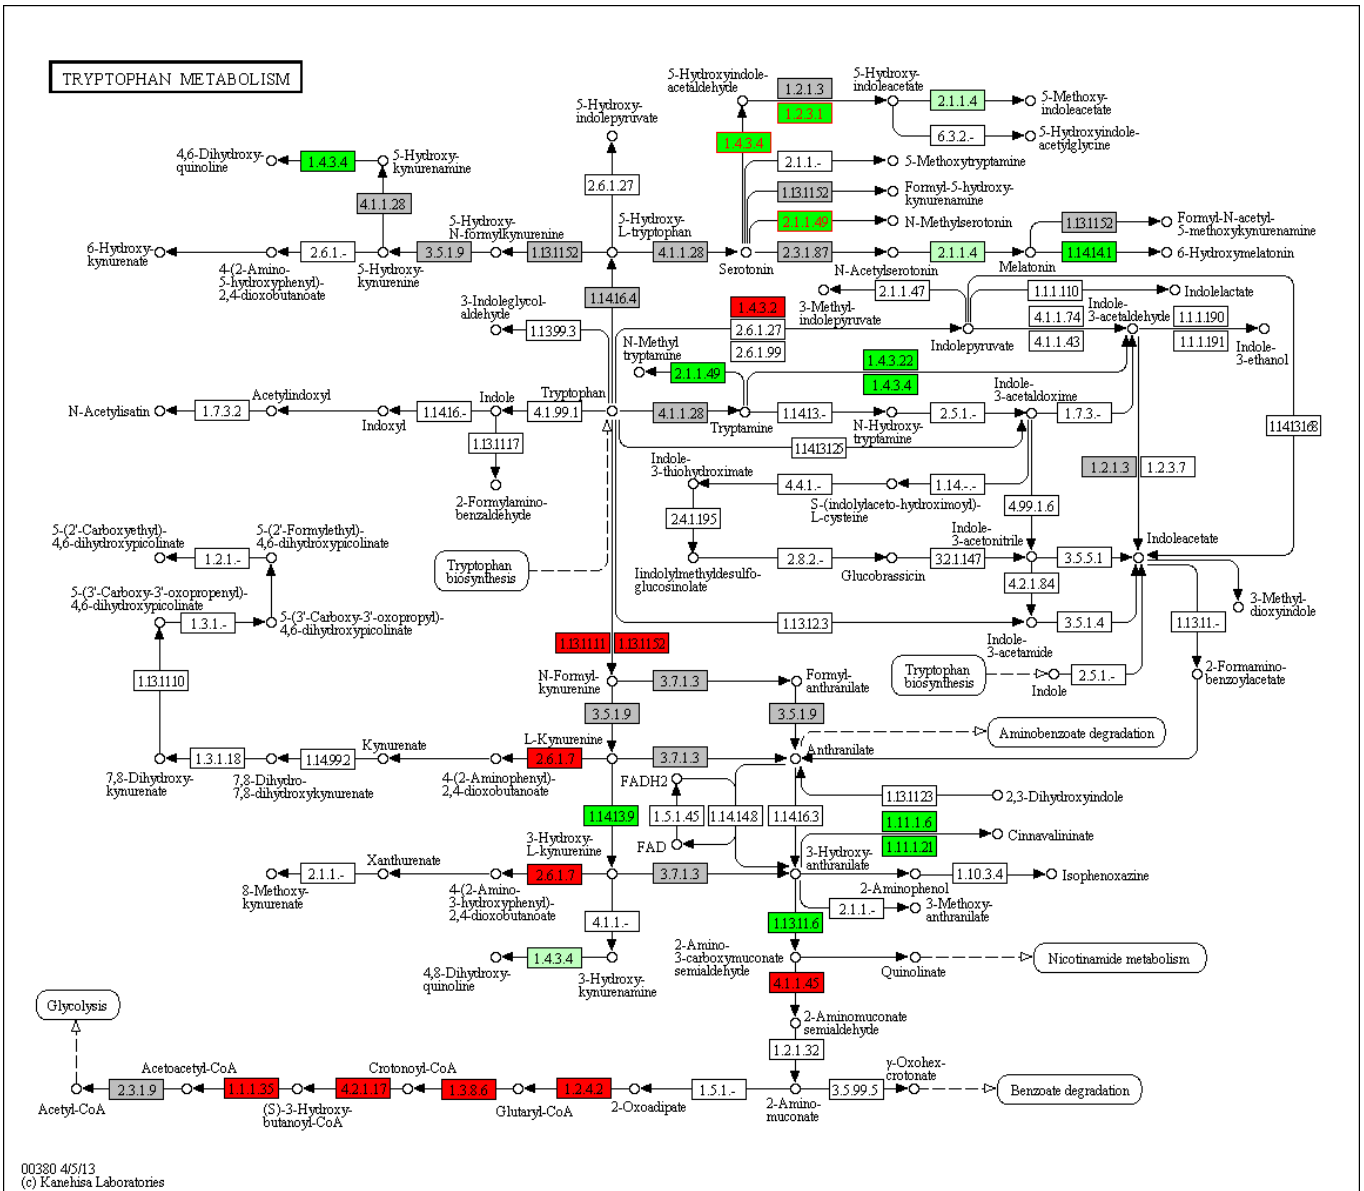

**Figure S3: Tryptophan metabolism in lung tumors compared to paired adjacent normal tissue**

red = up-regulated; green = down-regulated; gray = no notable change.  
(template is taken from <http://www.genome.jp/kegg/>)



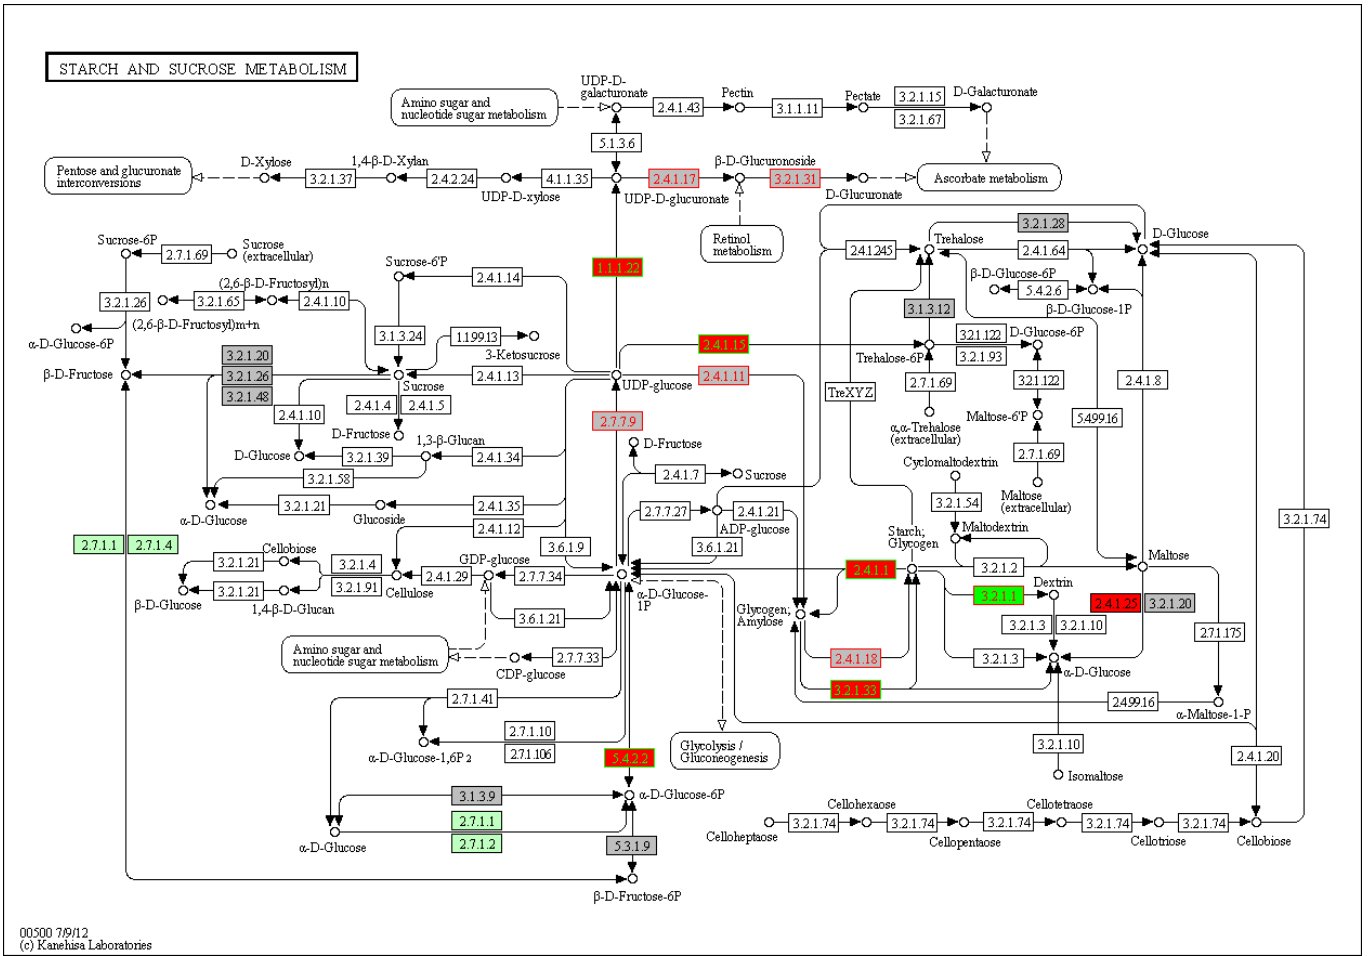

**Figure S4: Starch and sucrose metabolism in long-lived flies compared to flies with normal lifespan**

red = up-regulated in long lived flies; green = down-regulated; grey = no notable change; light green = enzyme present in flies, but no expression data available (template is taken from <http://www.genome.jp/kegg/>)

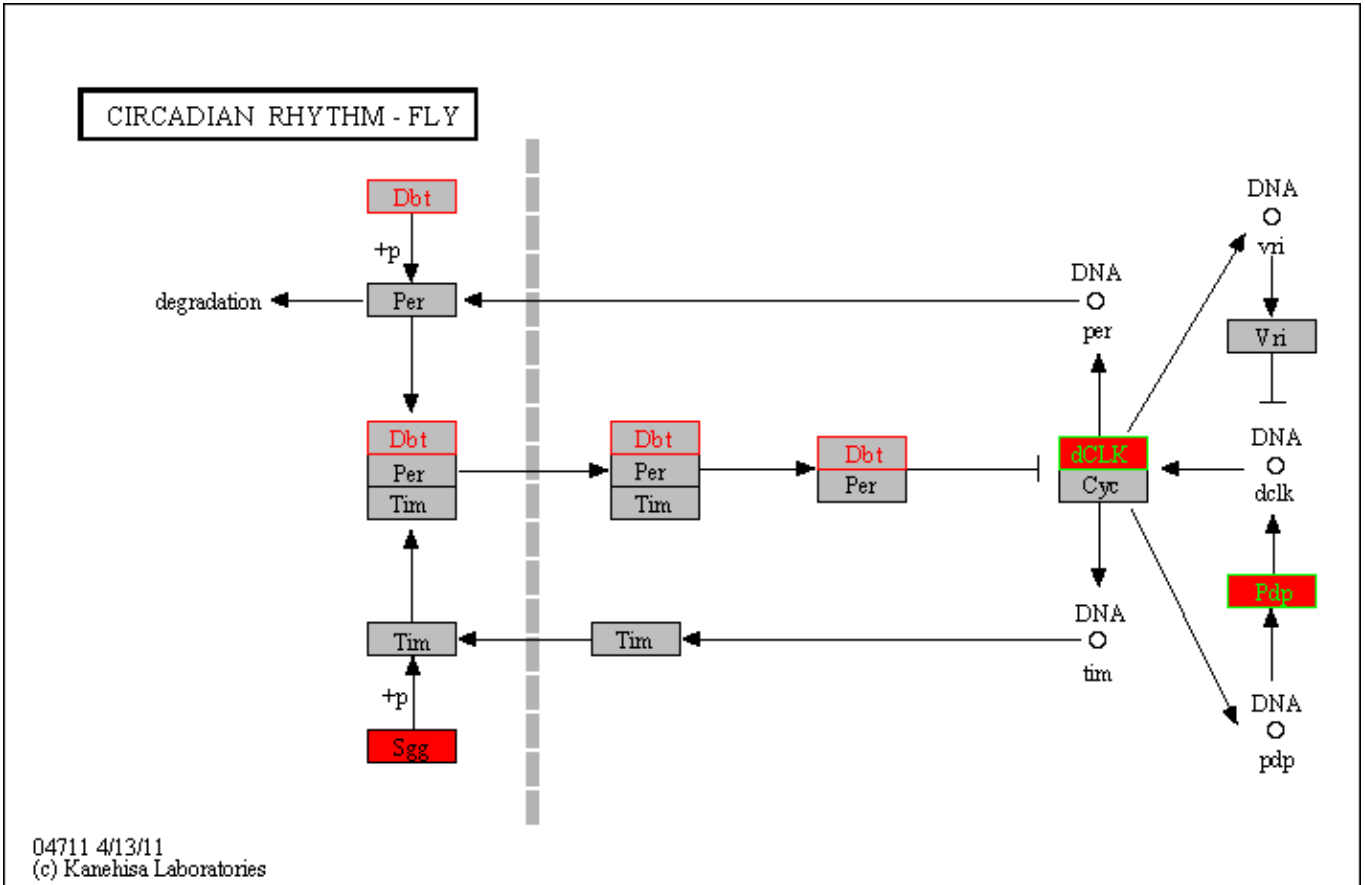

**Figure S5: Circadian rhythm in long-lived *D. melanogaster* compared to *D. melanogaster* with normal lifespan**

red = up-regulated; grey = no notable change (template is taken from <http://www.genome.jp/kegg/>)

## Stability of $P$ -values and robustness of pathway rankings

The pathway  $P$ -values estimated by PathWave suffer from a problem which is generally known for Monte Carlo resampling methods: the empirically determined  $P$ -values depend on what random permutations are actually executed and may thus change from execution to execution, even with the same dataset, because the executed number of random permutations (which gives an approximate  $P$ -value estimate) is usually much lower than the total number of possible permutations (which would give an accurate  $P$ -value estimate).

We therefore evaluated the stability and reproducibility of the pathway  $P$ -values and the resulting pathway rankings performing 100 identical PathWave runs for case study 2 (D. melanogaster aging; see article) and using three measures:

1. The variation coefficients (or coefficients of variation) of  $P$ -values of each pathway, defined as the ratio  $\sigma/\mu$  of the standard deviation  $\sigma$  to the mean  $\mu$ . Multiplication of this ratio by 100 measures the standard deviation as a percentage of the mean and indicates how strongly  $P$ -values variate over 100 identical runs.
2. The “recall” of pathways (i.e. the number of times a pathway is declared significant) as a function of its mean  $P$ -value, indicating how frequently pathways with a  $P$ -value close to the threshold are possibly missed or wrongly declared significant.
3. The average pairwise Spearman correlation between the 100 pathway rankings obtained from the 100 identical PathWave runs, indicating how stable pathway rankings are across multiple identical runs.

To evaluate how these measures depend on the number of Monte Carlo samplings (parameter `numperm`) used for  $P$ -value estimation, we executed PathWave 100 times (identical runs) for each of `numperm=100`, `numperm=1000`, and `numperm=10000`.

The results show that for 10,000 random samplings (used in the article), the  $P$ -values of single pathways (Figure S6) are highly stable (standard deviation < 5% of mean for most pathways), as are the overall pathway rankings (Figure S8; median pairwise Spearman correlation of 0.9996) over 100 runs. Moreover, the results indicate an excellent recall (Figure S7; right). As expected, pathways with an average  $P$ -value very close to 0.05 (here ca.  $\pm 2\%$ ) are declared significant in roughly 50% of the runs. Pathways with average  $P < 0.045$  have a recall of >95% (100% for average  $P < 0.04$ ).

For 1,000 random samplings (used as a default in the PathWave R package), the results indicate a slightly lower but still sufficient stability. The  $P$ -values of most pathways have standard deviations of <20% of their mean (Figure S6), and the obtained pathway rankings are nearly as stable as for 10,000 random samplings (Figure S8; median pairwise Spearman correlation of 0.9970). Although pathways with an average  $P$ -value of close to 0.05 are recalled with slightly more difficulty (Figure S7; middle), their overall recall is still good (>95% for average  $P < 0.04$ ; 100% for average  $P < 0.03$ ).

For 100 random samplings, in contrast, both the  $P$ -values (Figures S6 and S7) and the pathway rankings (Figure S8) are not sufficiently stable.

Overall, these analyses suggest that 1,000 random samplings (default in the R package) are sufficient and offer a reasonably high confidence in the obtained results. The 10,000 random samplings used in the article allow for an even higher confidence as well as an excellent stability.

### Variation coefficients of pathway P-values over 100 runs

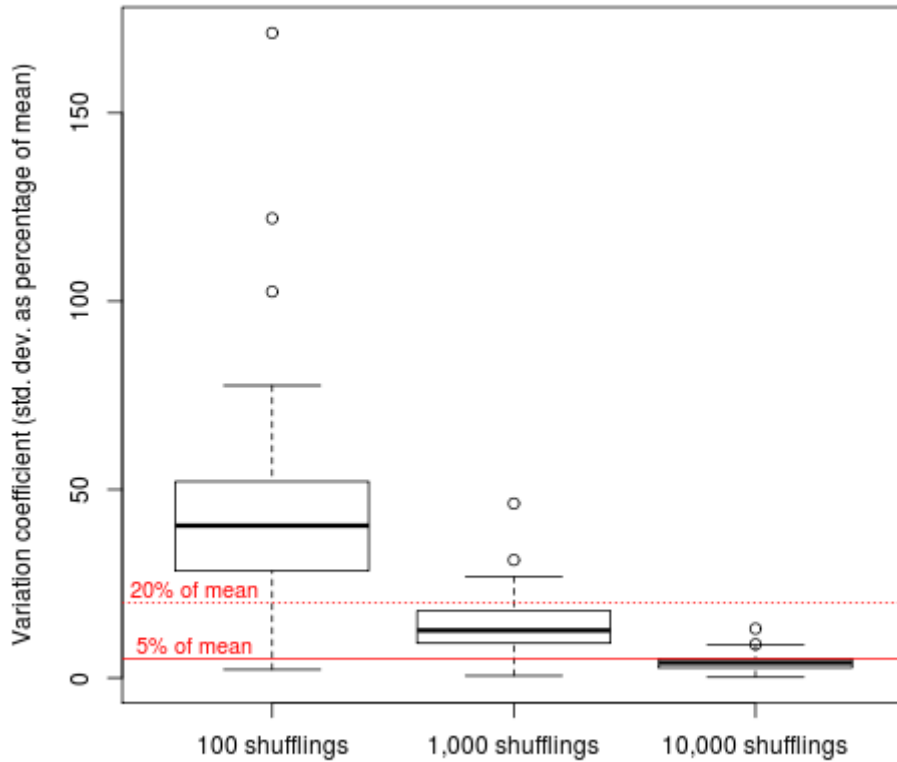

D. melanogaster aging dataset (case study 2)

### Figure S6: Stability of pathway P-values as measured by their variation coefficients

The variation coefficients were determined for each single pathway over 100 identical PathWave runs. Boxplots depict the distribution of variation coefficients of the pathways for 100 (left), 1000 (middle), and 10,000 random samplings (`numperm`).

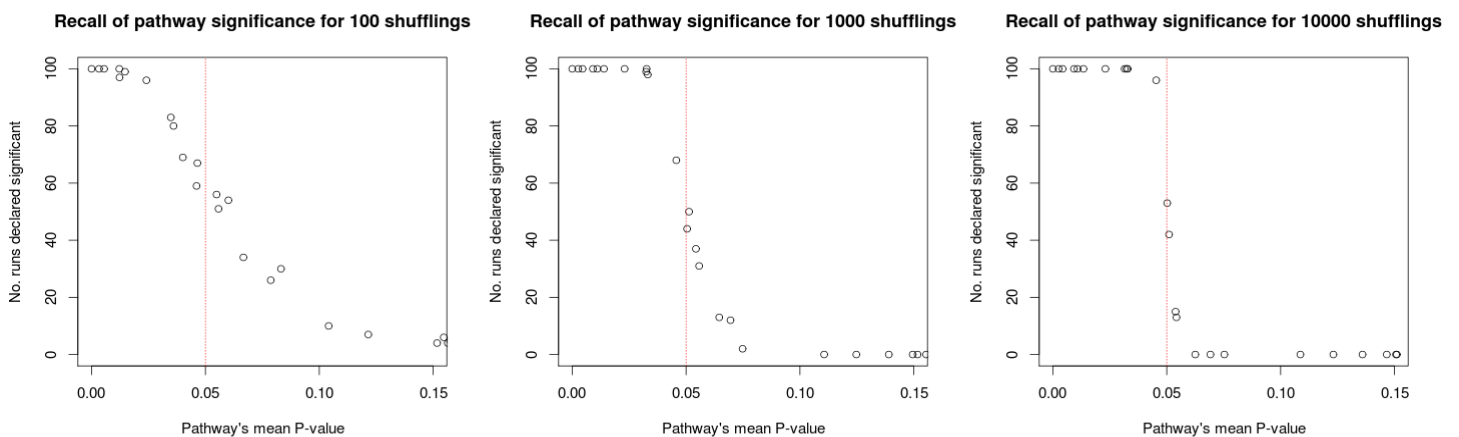

### Figure S7: Recall of pathway significance as a function of the mean P-value

The number of times a pathway is declared significant (at a P-value threshold of 0.05) in 100 identical PathWave runs is drawn as a function of the pathway's mean P-value for 100 (left), 1000 (middle), and 10,000 (right) random samplings (`numperm`).

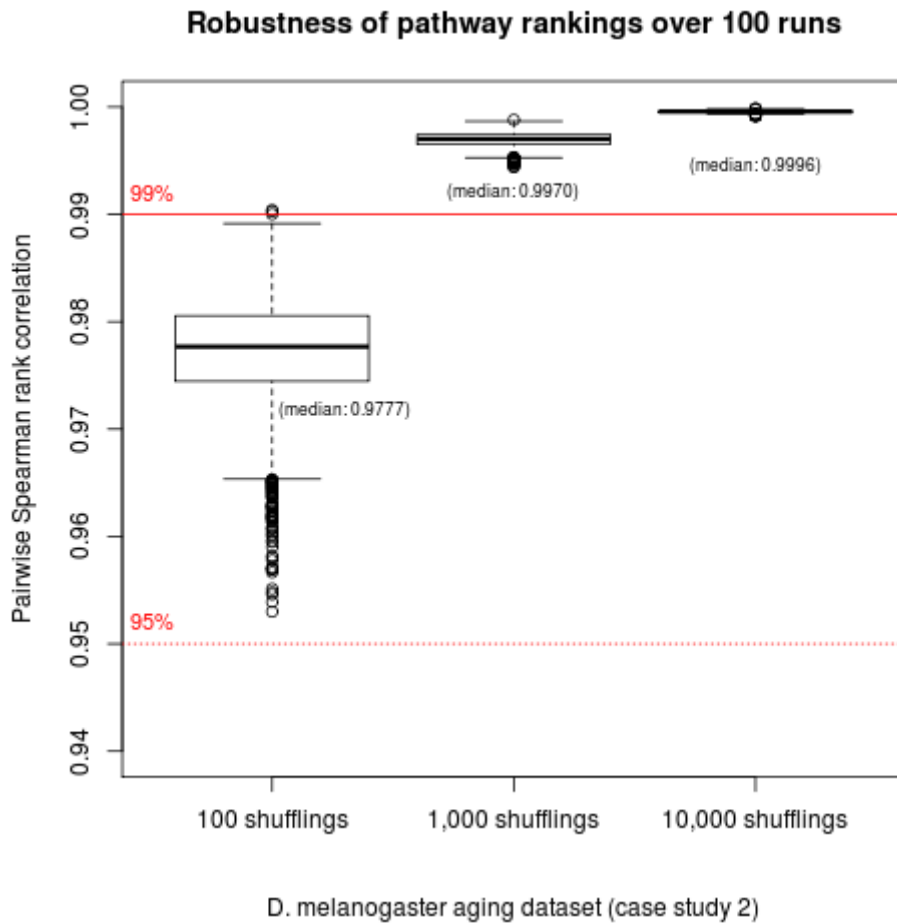

**Figure S8: Robustness of pathway rankings**

The robustness of pathway rankings over 100 identical PathWave runs is shown as boxplots of the rankings' pairwise Spearman rank correlations for 100 (left), 1000 (middle) and 10,000 random samplings (`numperm`).
